# Supplementary material for: A subset of ipRGCs regulates both maturation of the circadian clock and segregation of retinogeniculate projections in mice
Source: eLife journal article supplement (doi:10.7554/elife.22861), 2017-06-15
Supplement: supp [file elife-22861-supp-v1.zip]

## A. Actograms for all *Opn4*<sup>DTA/LacZ</sup> mice

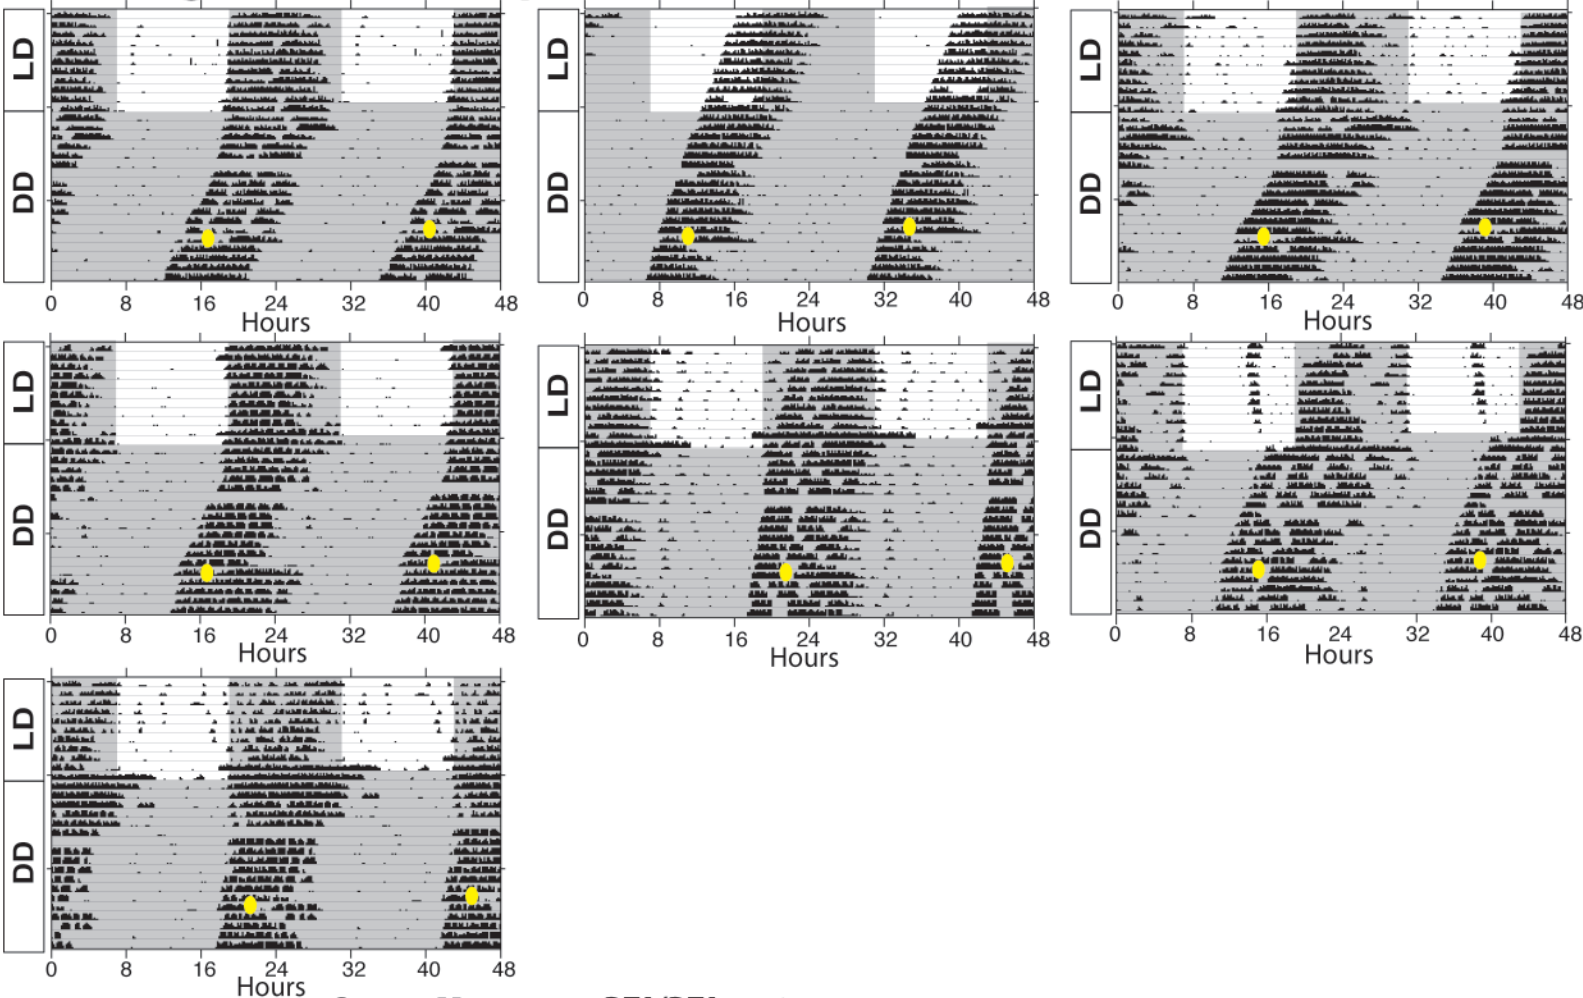

## B. Actograms for all *Opn4*<sup>DTA/DTA</sup> mice

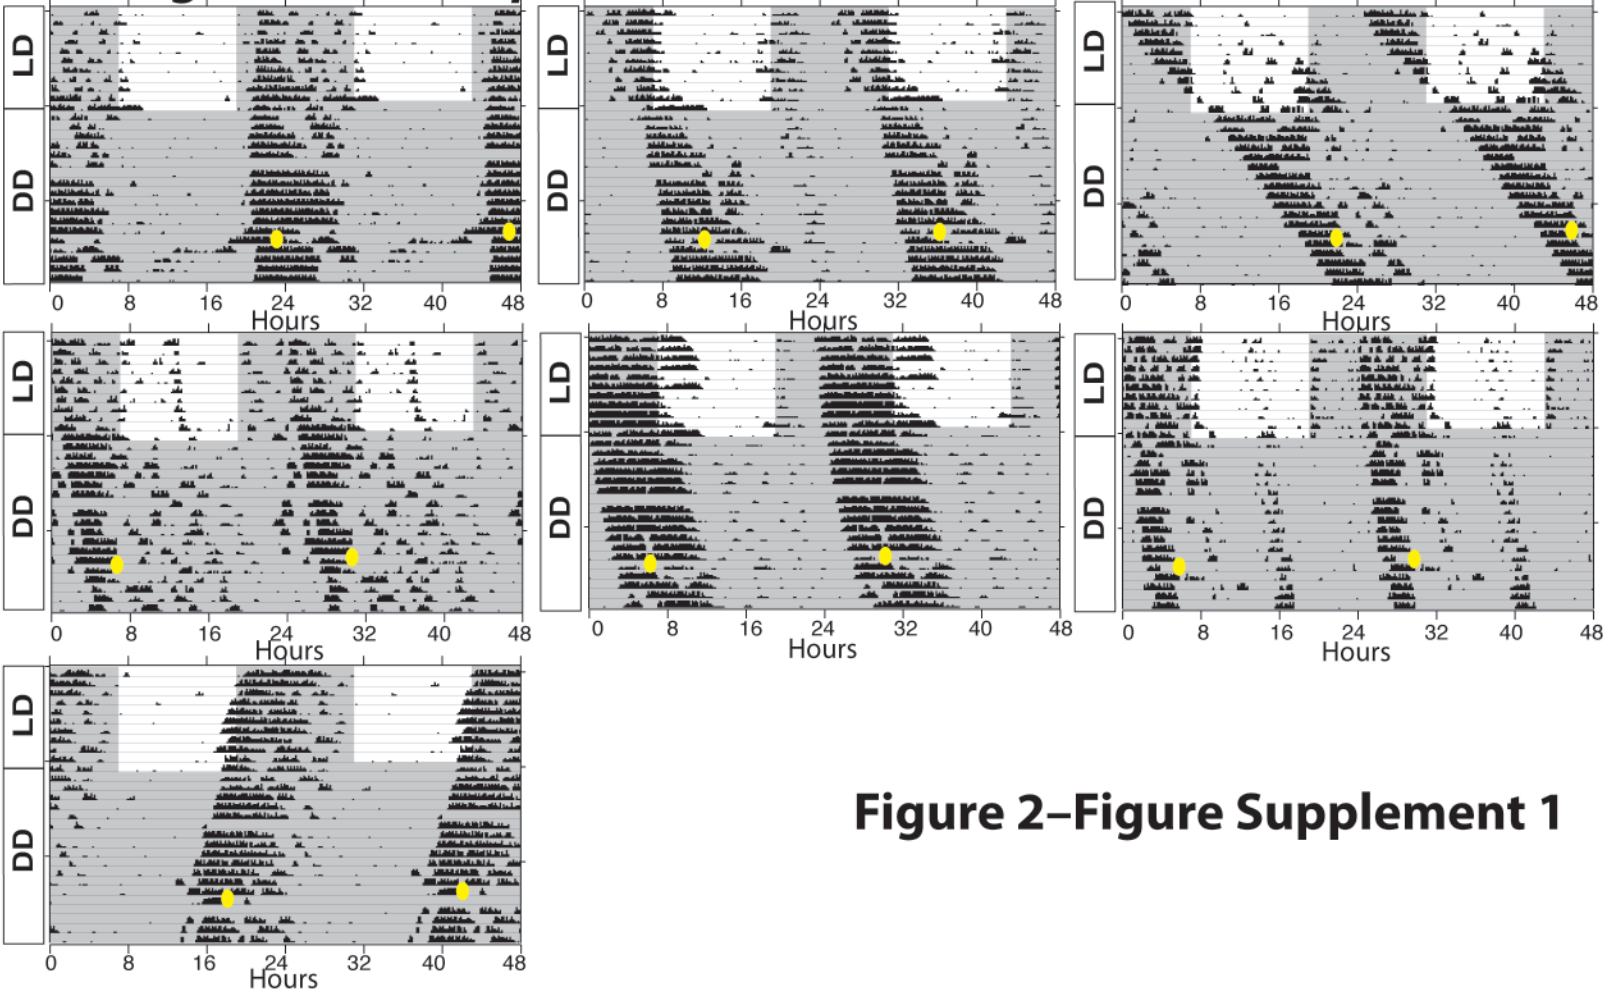

Figure 2–Figure Supplement 1
