# Supplementary figures and images for: A subset of ipRGCs regulates both maturation of the circadian clock and segregation of retinogeniculate projections in mice
Source: eLife journal article supplement (doi:10.7554/elife.22861), 2017-06-15

**A**

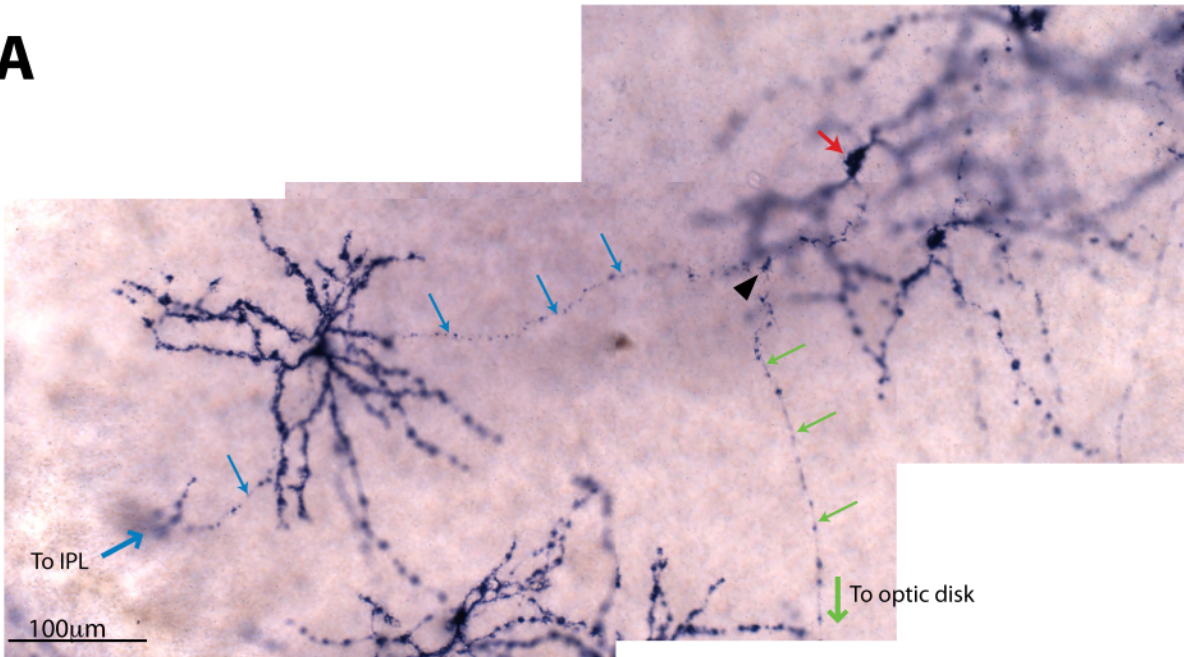

**B**

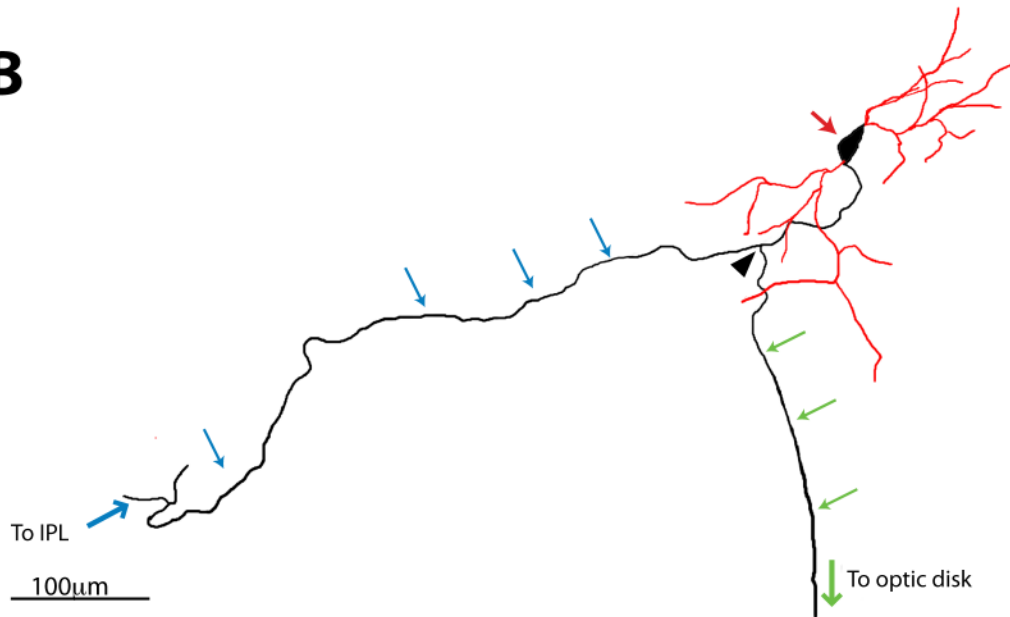

**Figure 4–Figure Supplement 1**

Supplement: supp [file elife-22861-supp-v1.zip]

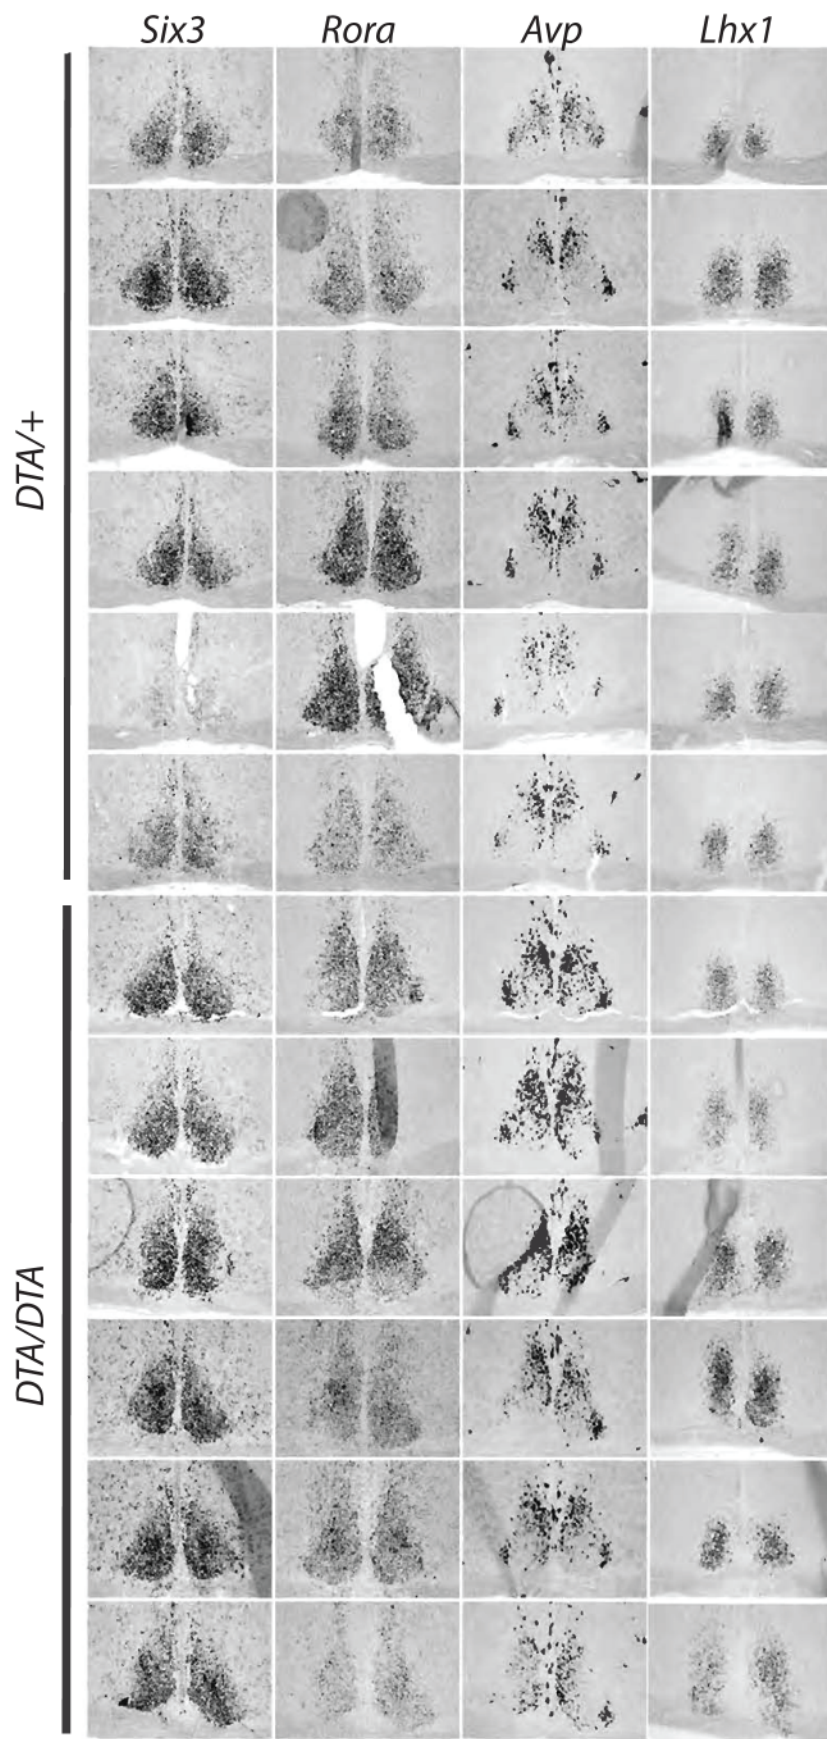

**Figure 2–Figure Supplement 2**

Supplement: supp [file elife-22861-supp-v1.zip]

**A**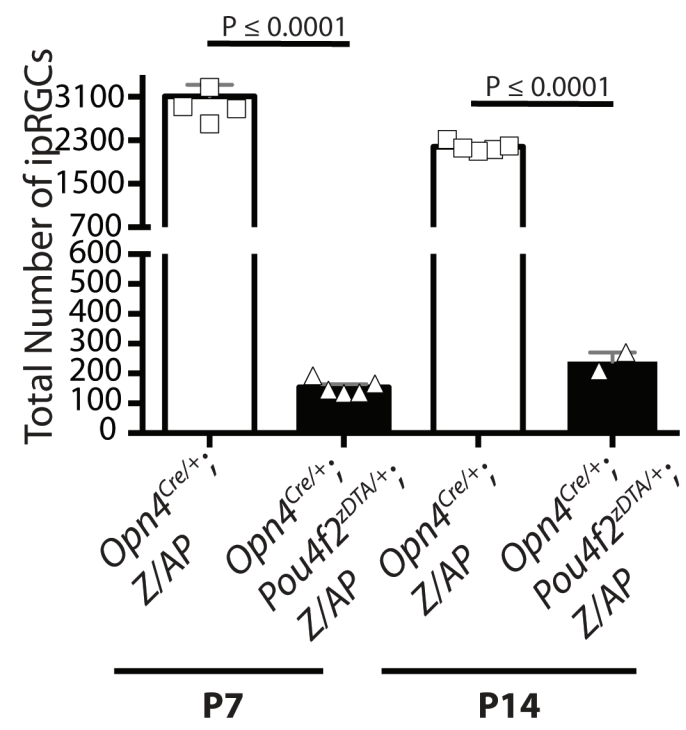**B**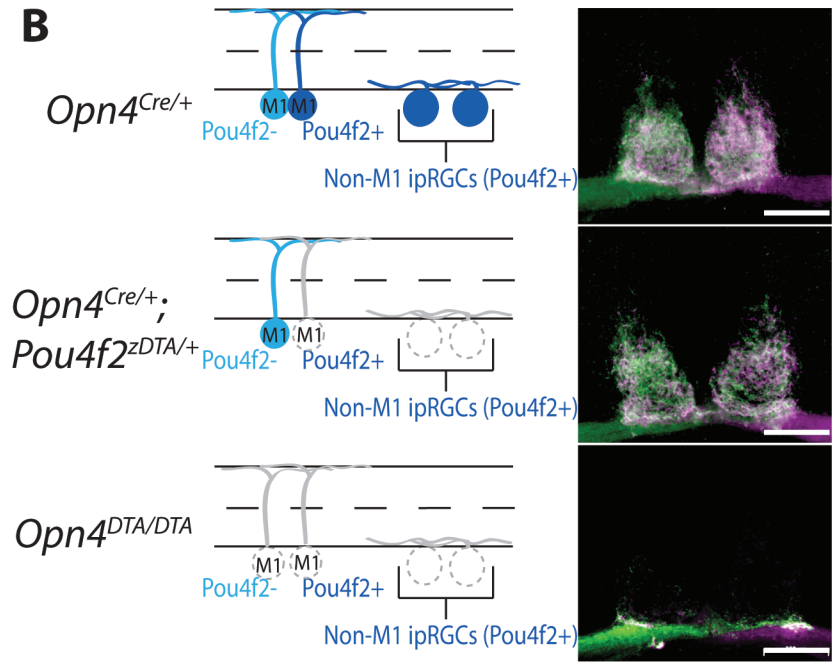

**Figure 4–Figure Supplement 5**

Supplement: supp [file elife-22861-supp-v1.zip]

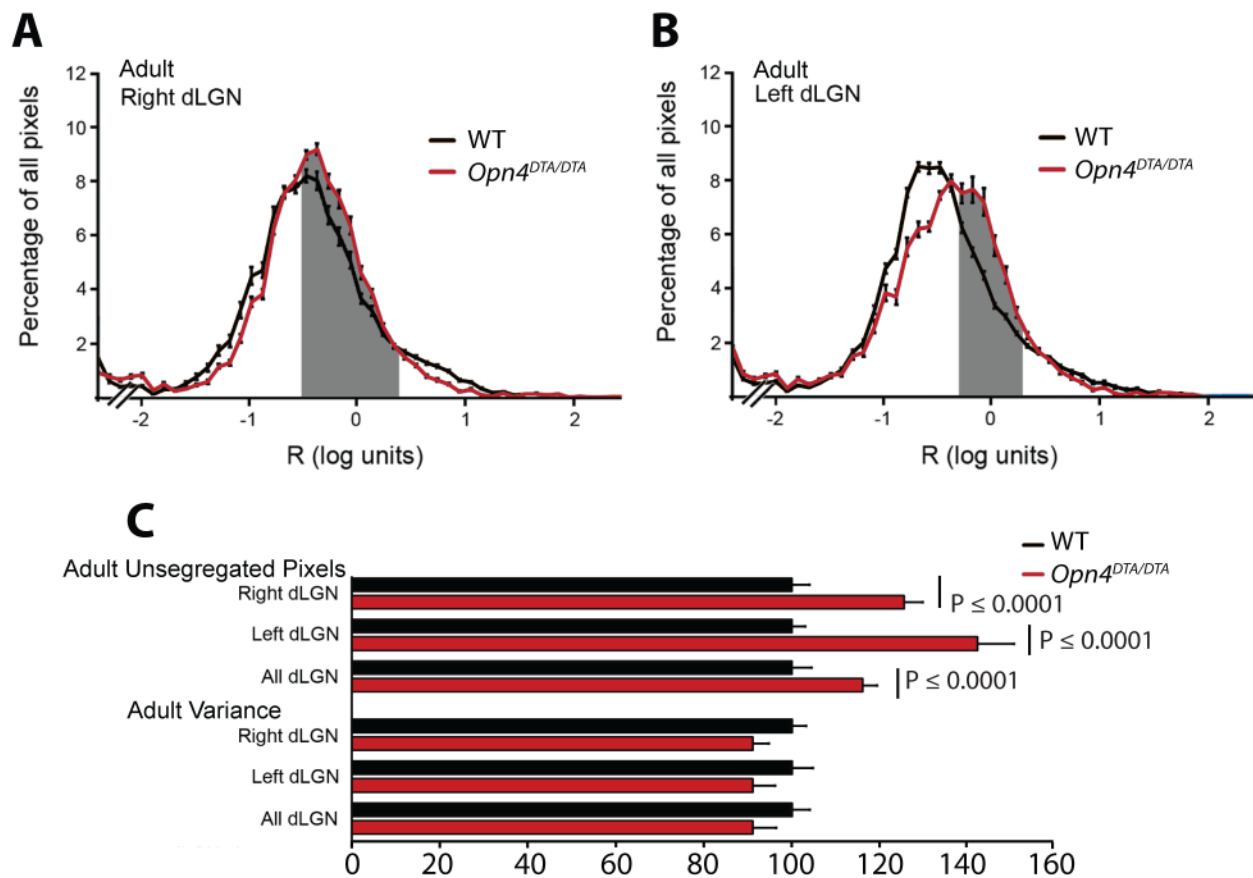

**Figure 4–Figure Supplement 3**

Supplement: supp [file elife-22861-supp-v1.zip]

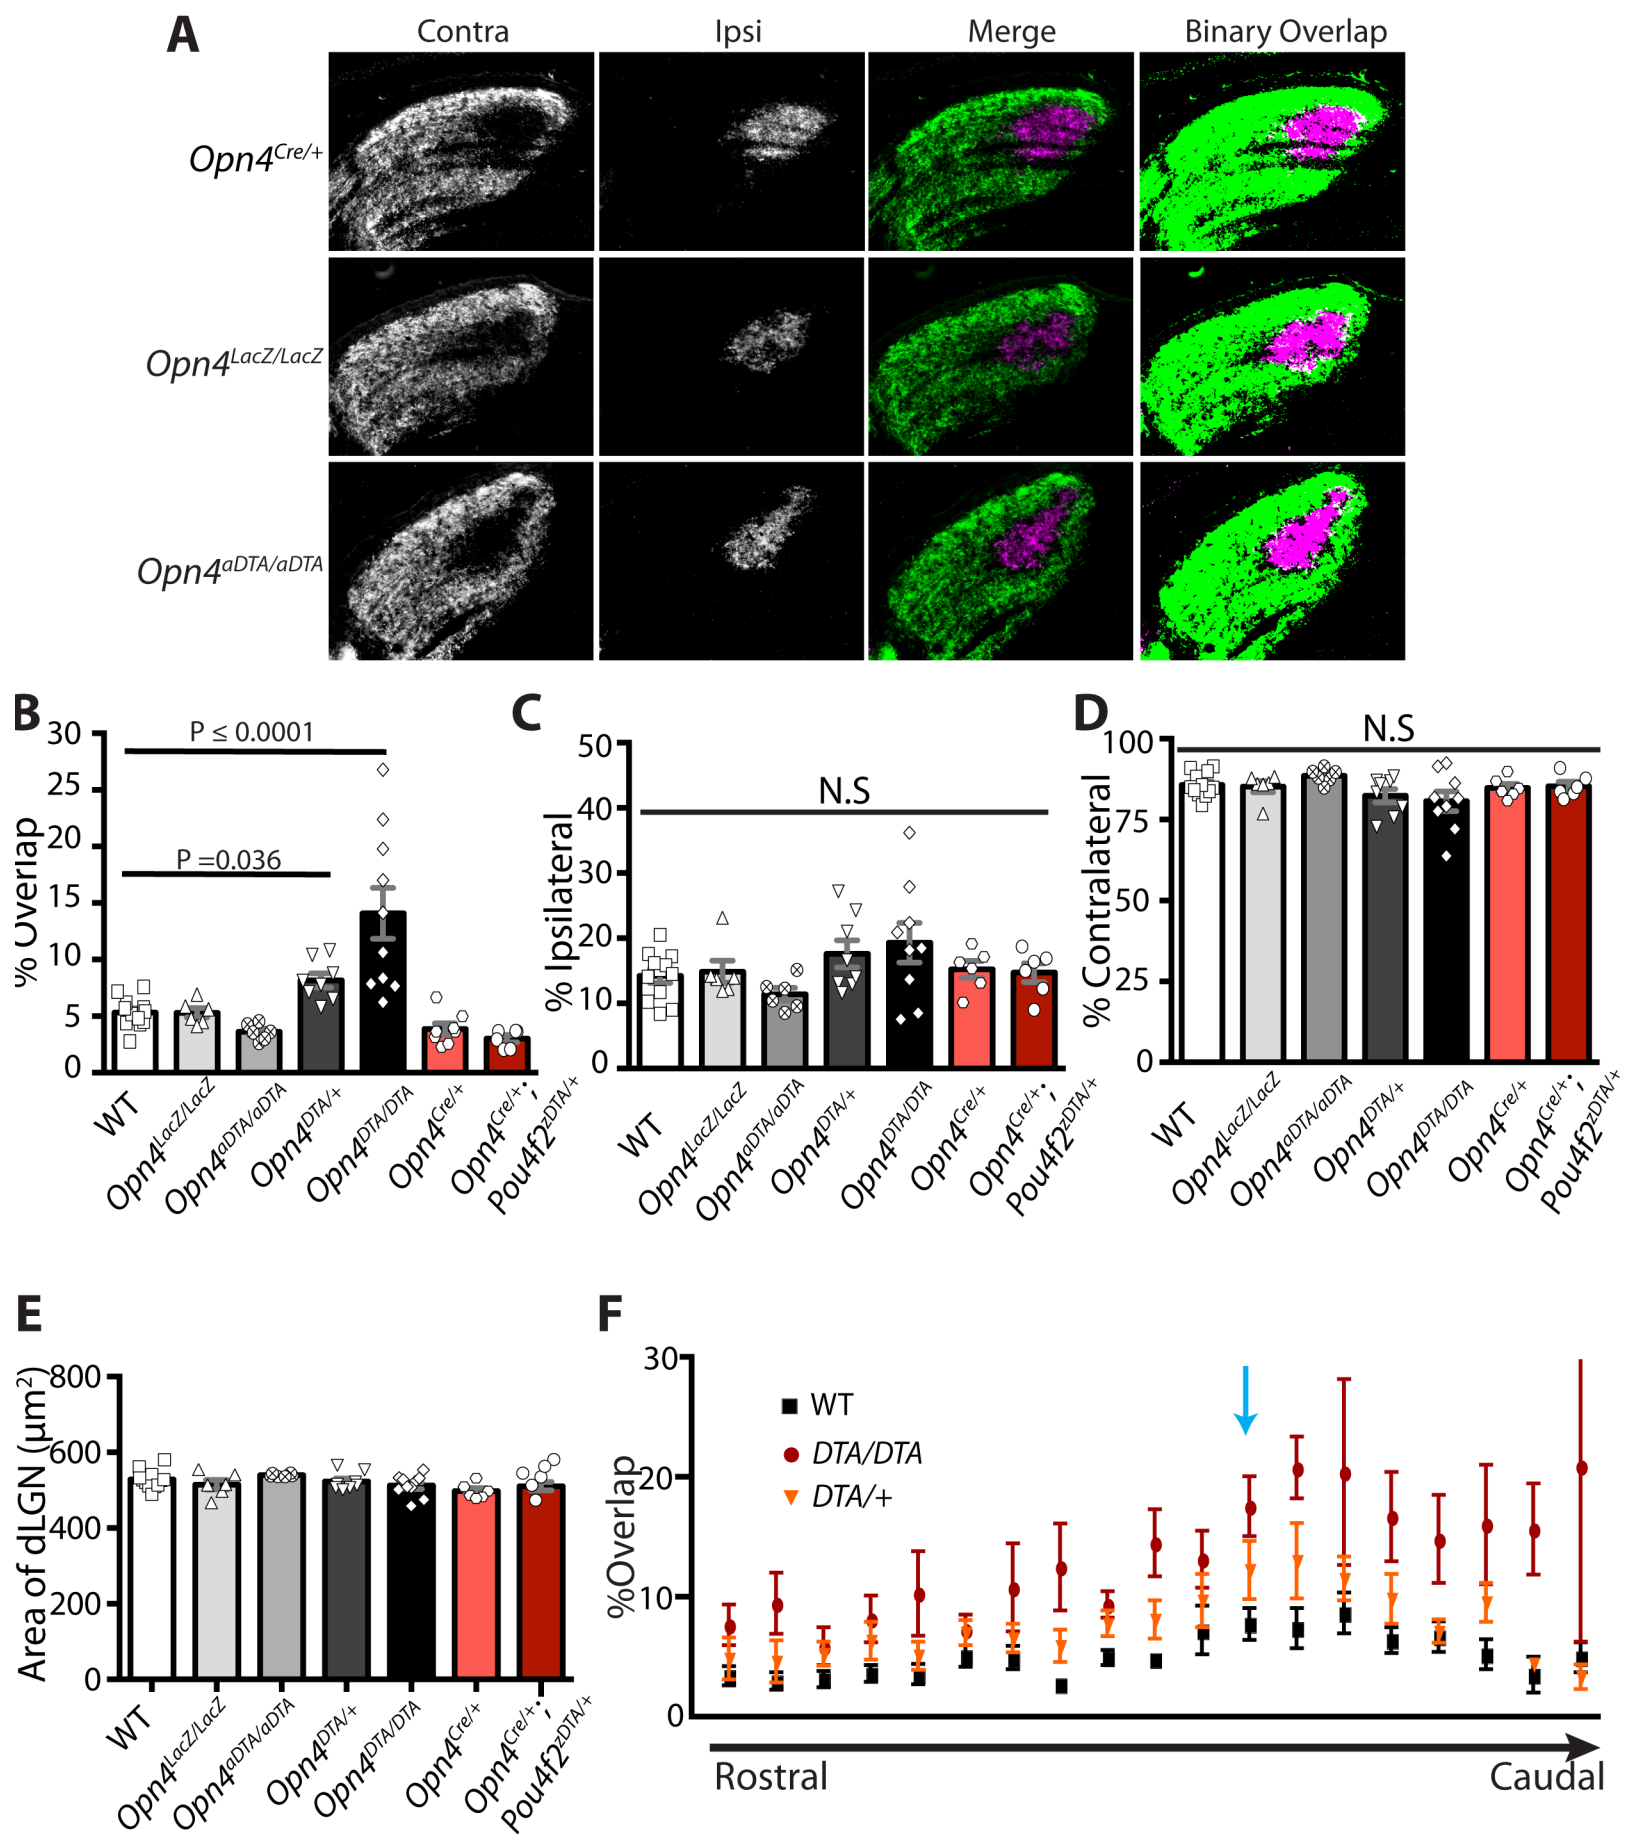

**Figure 4–Figure Supplement 4**

Supplement: supp [file elife-22861-supp-v1.zip]

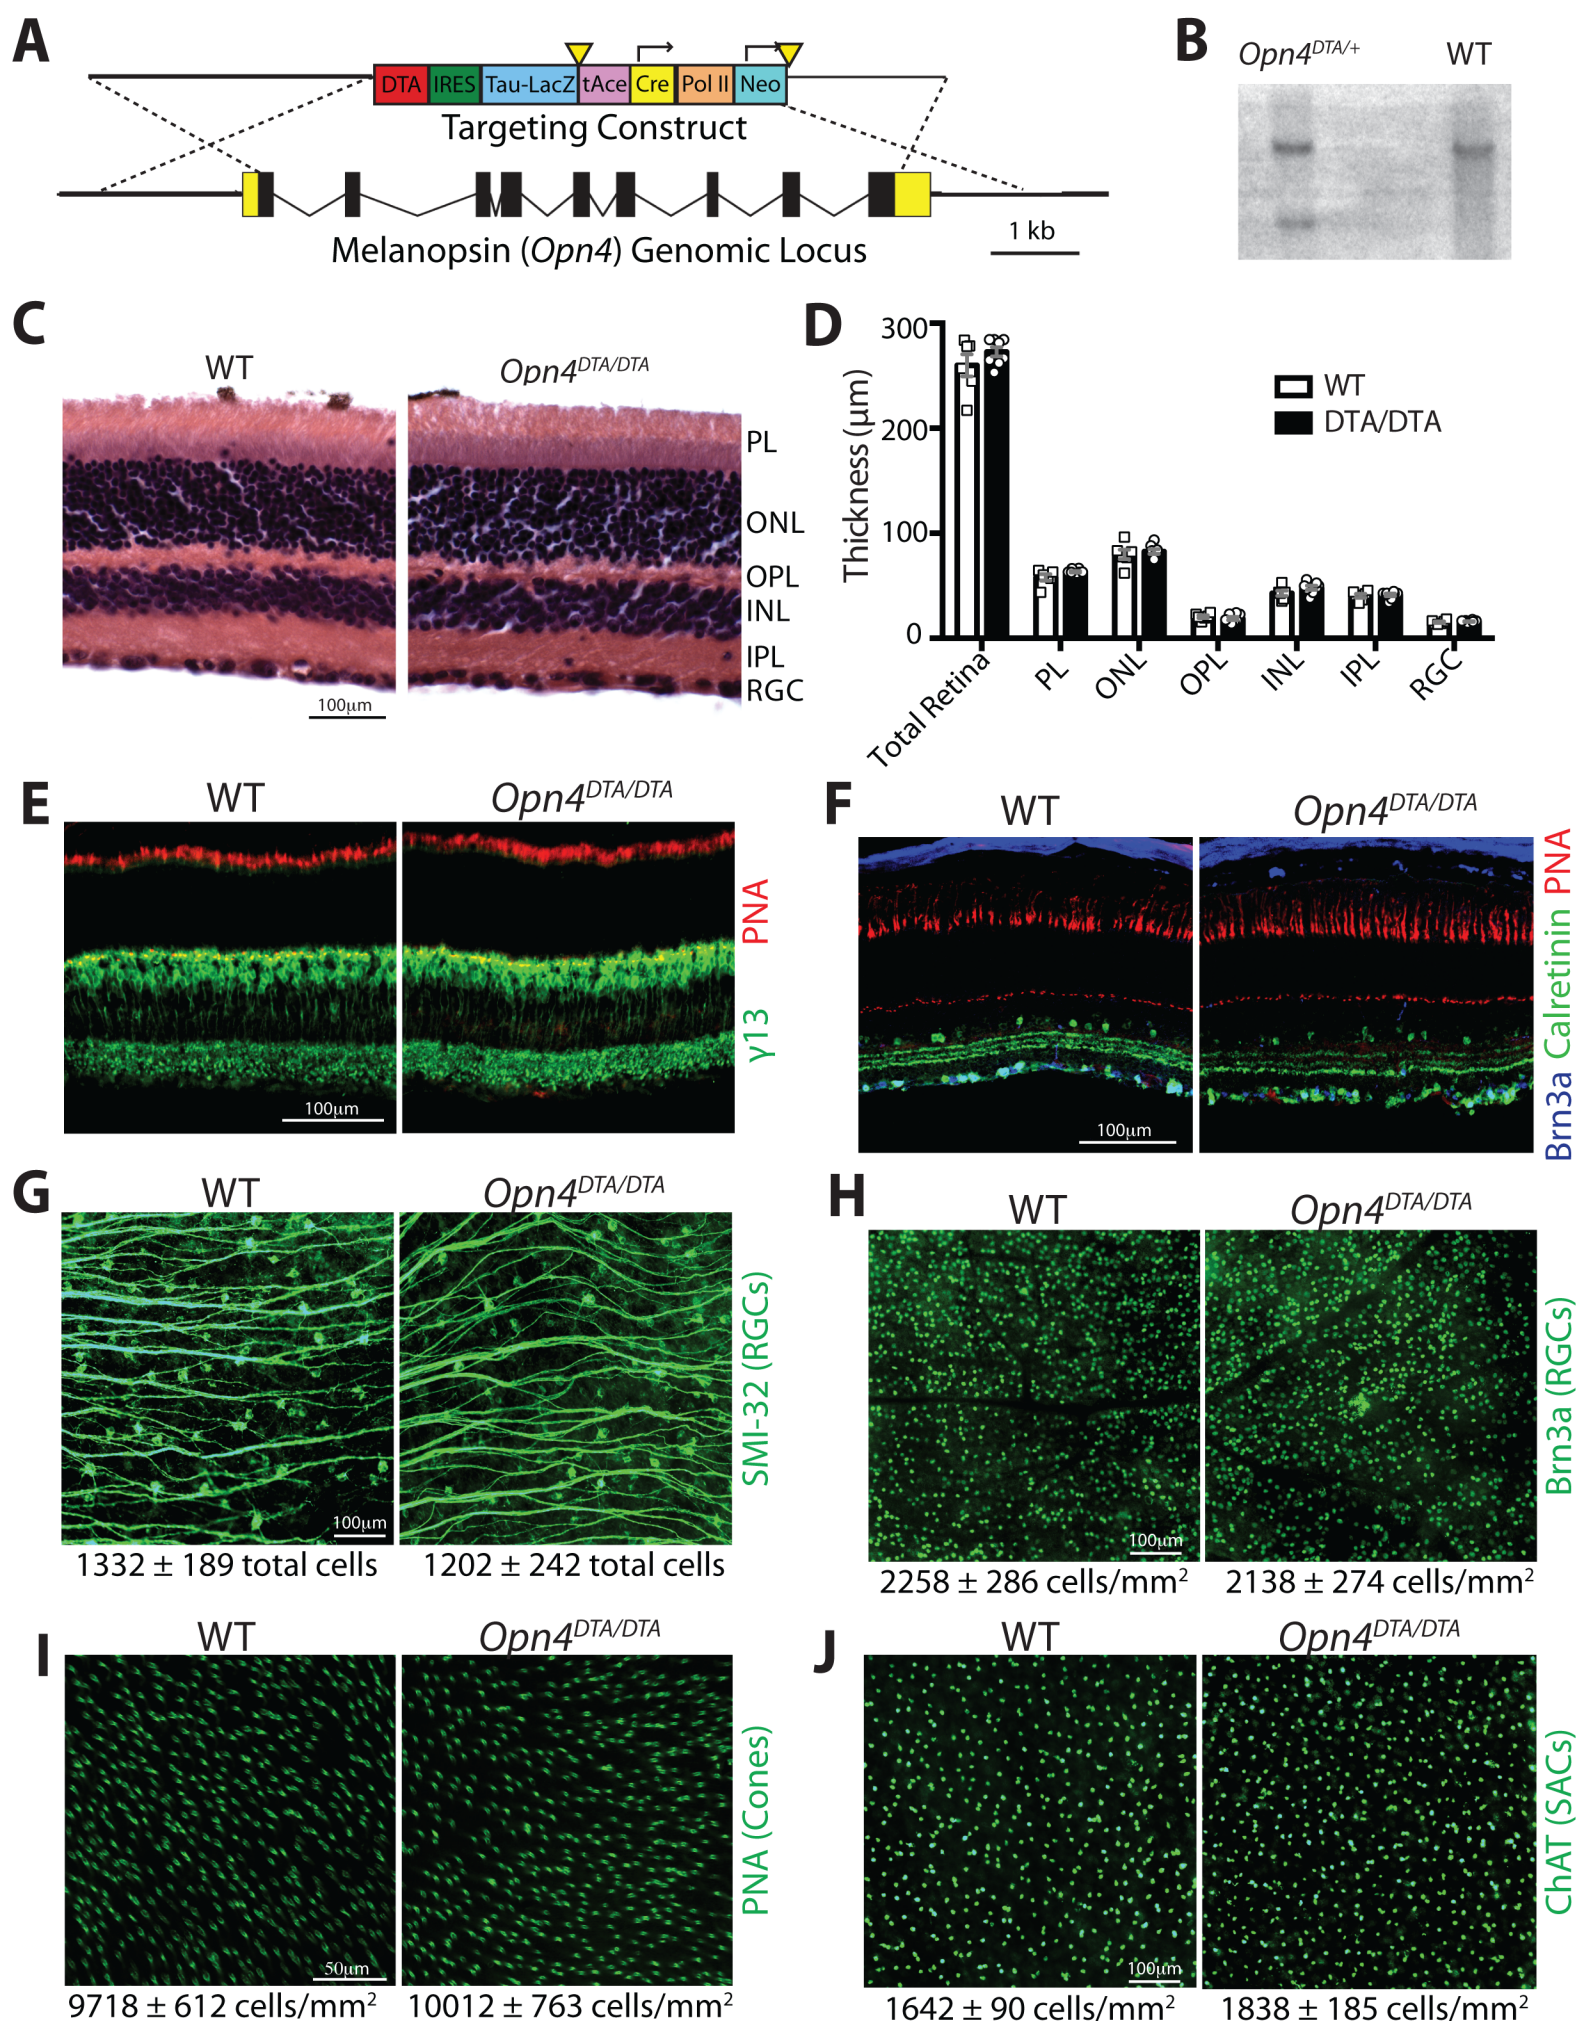

**Figure 1–Figure Supplement 1**

Supplement: supp [file elife-22861-supp-v1.zip]

# All actograms for dark reared mice

Lengthened Period:

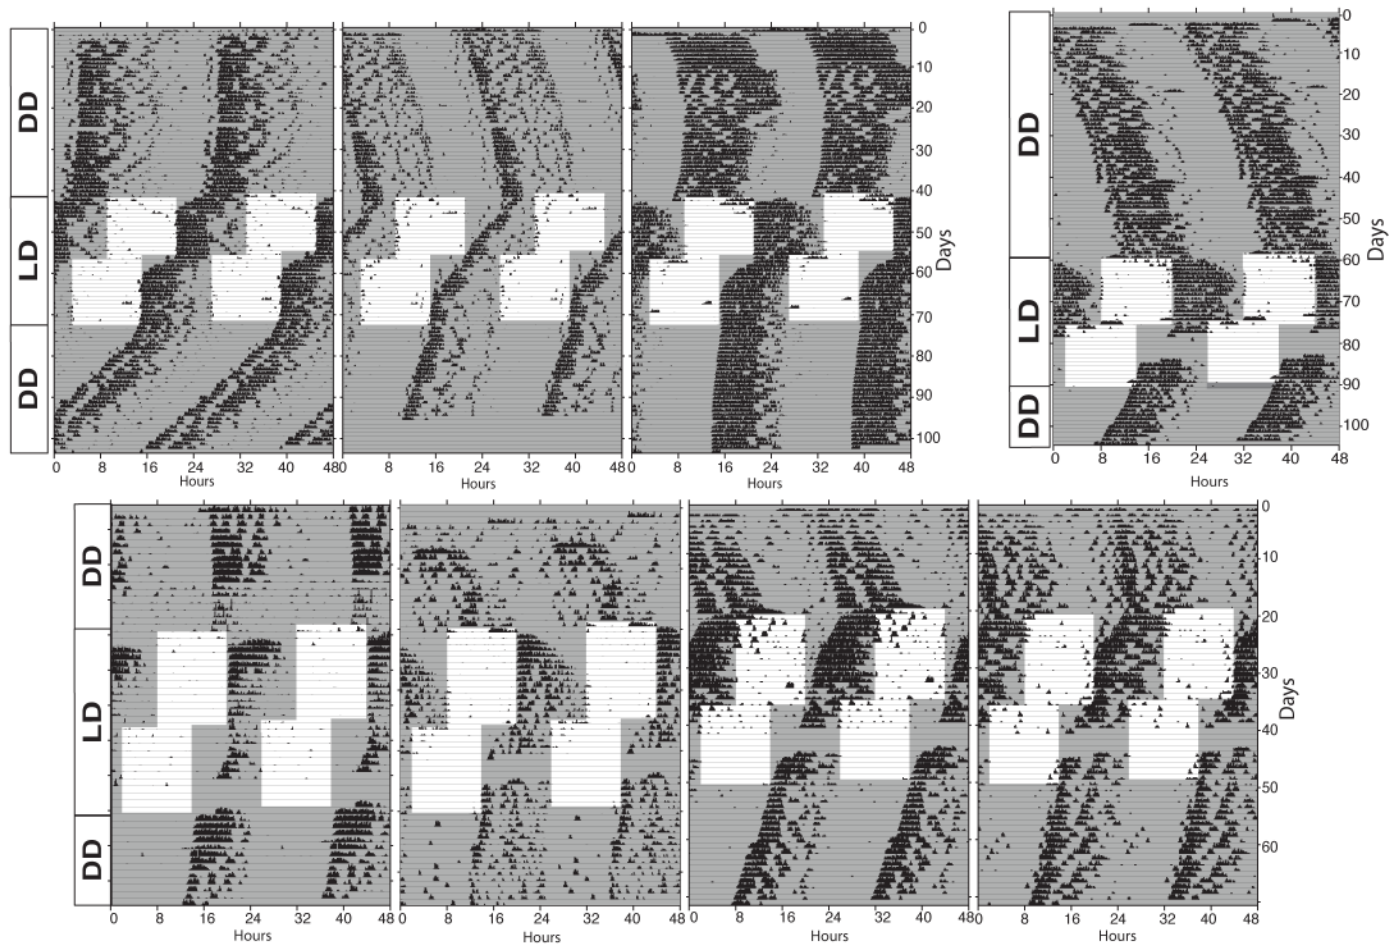

WT Period:

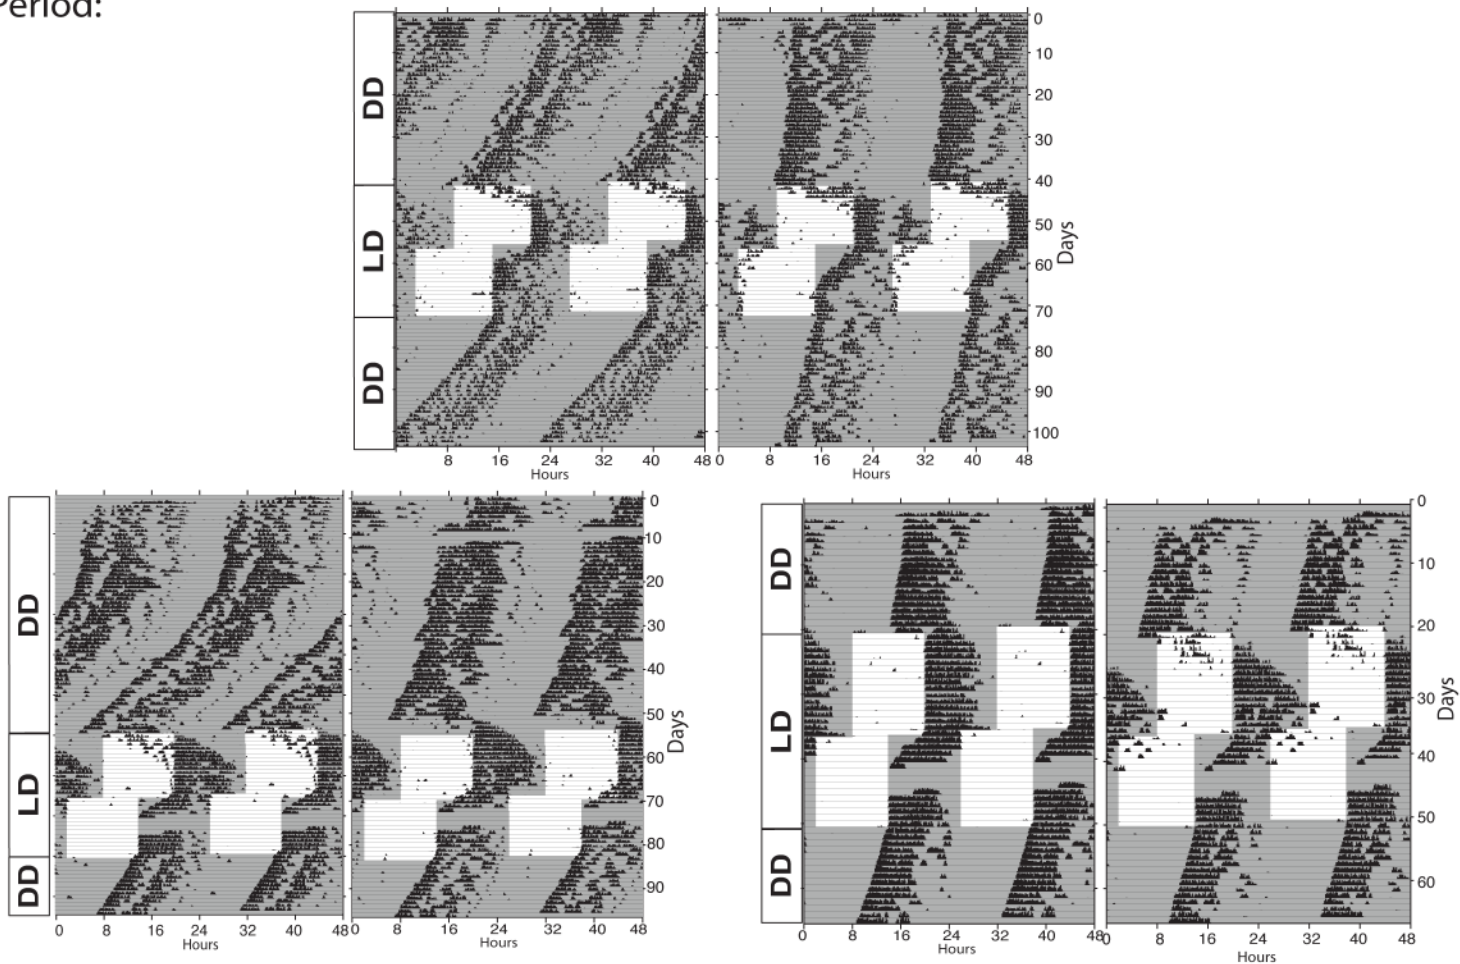

Figure 3–Figure Supplement 1

Supplement: supp [file elife-22861-supp-v1.zip]

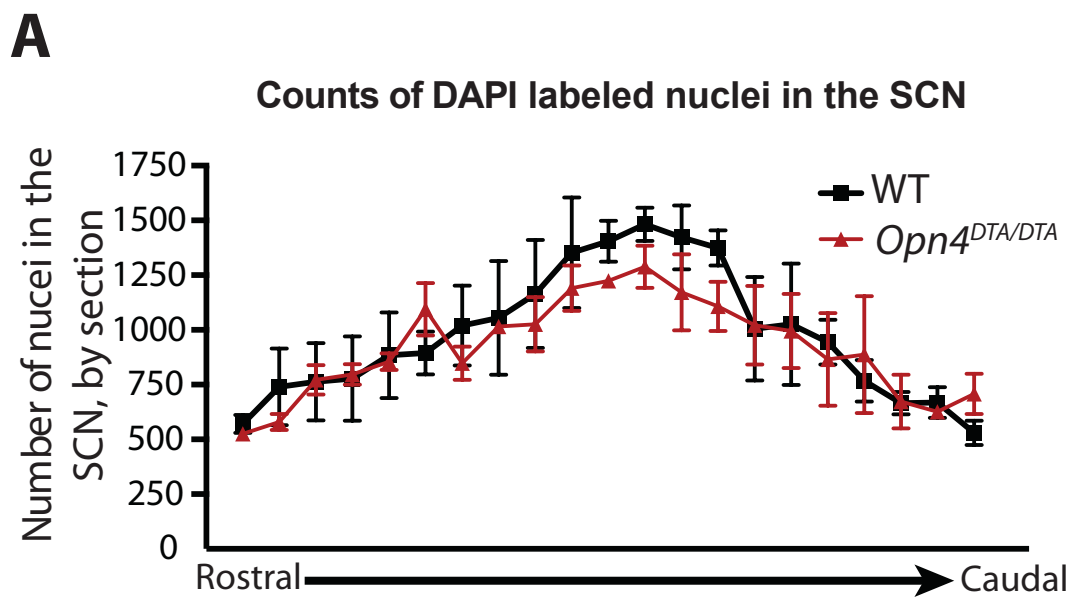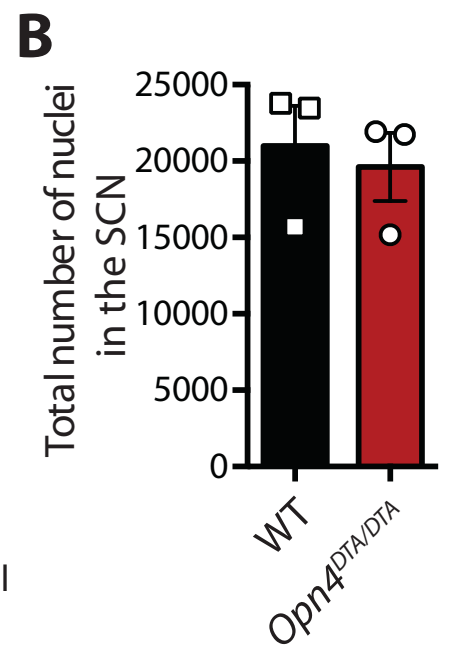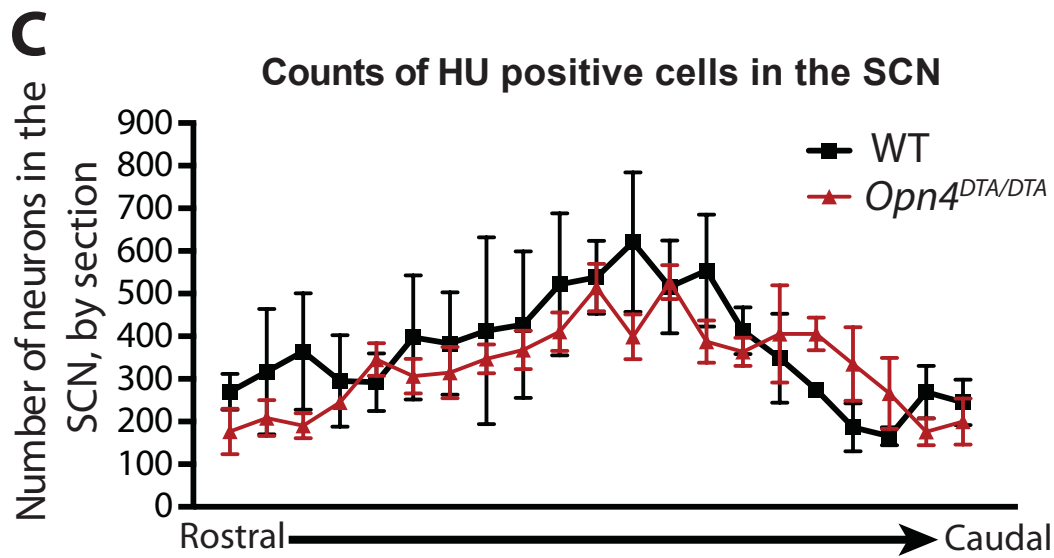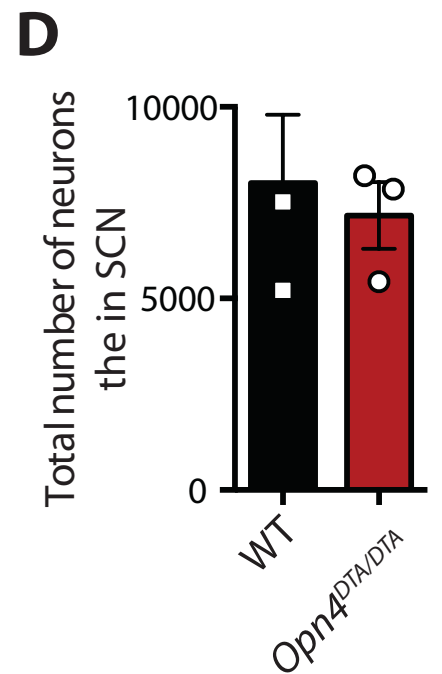

Figure 1–Figure Supplement 2

Supplement: supp [file elife-22861-supp-v1.zip]

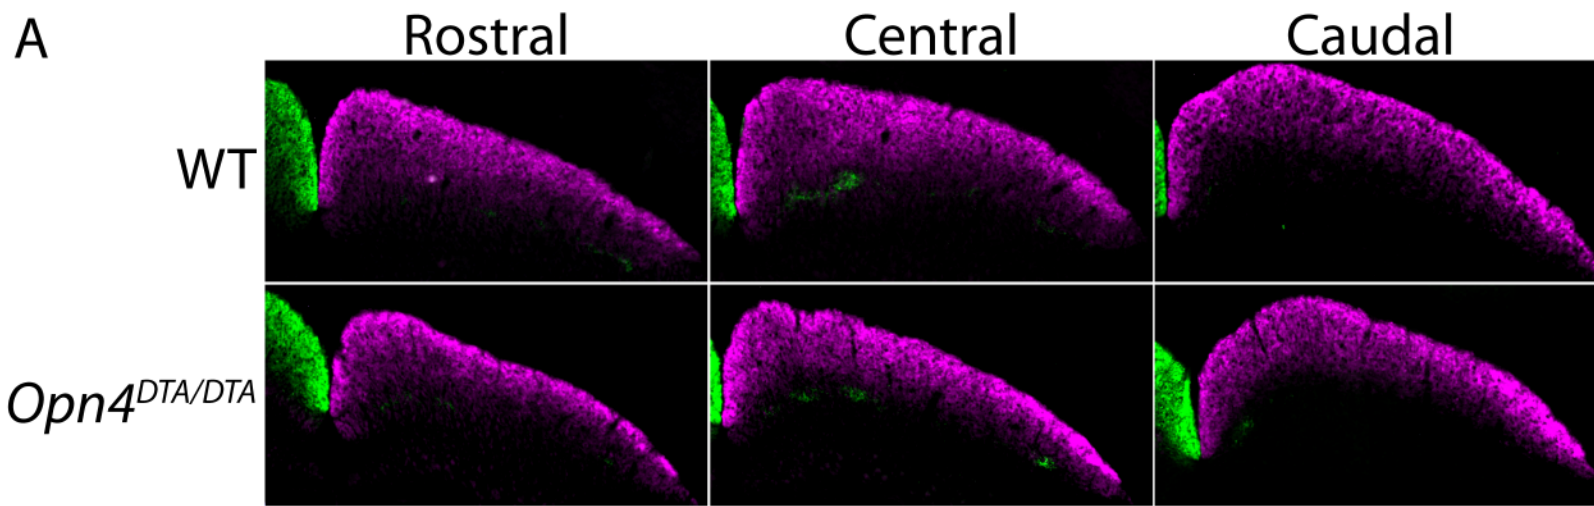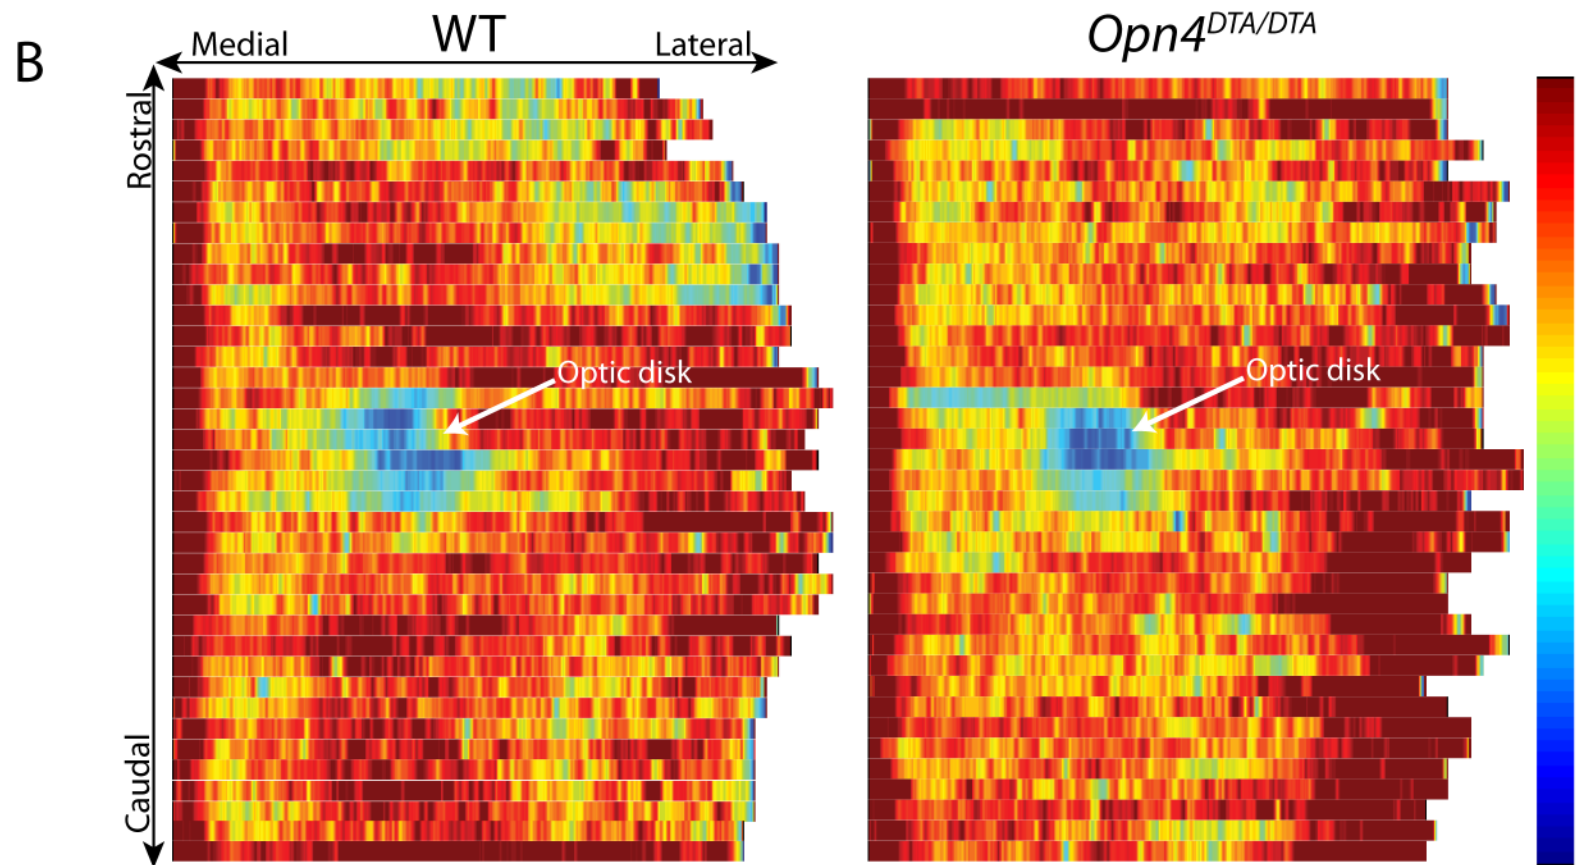

**Figure 4–Figure Supplement 2**

Supplement: supp [file elife-22861-supp-v1.zip]
